# Supplementary material for: Diagnosis and Prognostication of Ductal Adenocarcinomas of the Pancreas Based on Genome‐Wide DNA Methylation Profiling by Bacterial Artificial Chromosome Array‐Based Methylated CpG Island Amplification
Source: Hindawi journal article supplement (doi:10.1155/2011/780836), 2010-12-21

Supplementary Table SI. The list of 331 BAC clones, for which the average signal ratios in T-samples differed significantly from those in both C- and N-samples.

| BAC clone ID | Location *    |
|--------------|---------------|
| RP11-41H8    | 1p36.33       |
| RP11-51D17   | 1p36.32       |
| RP11-476D13  | 1p36.22       |
| RP11-169K16  | 1p36.13       |
| RP11-145C4   | 1p36.13       |
| RP11-276L11  | 1p35.2        |
| RP11-89P8    | 1p35.2        |
| RP11-104P21  | 1p35.1        |
| RP11-88J24   | 1p34.3        |
| RP11-89N10   | 1p34.3        |
| RP11-221L2   | 1p32.2        |
| RP11-181B18  | 1p31.1        |
| RP11-193E22  | 1p31.1        |
| RP11-237C19  | 1p31.1        |
| RP11-259N12  | 1p21.1        |
| RP11-110J1   | 1q23.1        |
| RP11-536C5   | 1q23.2        |
| RP11-91G14   | 1q23.2        |
| RP11-28D10   | 1q24.2        |
| RP11-212K9   | 1q25.3        |
| RP11-65I22   | 1q32.1        |
| RP11-335O13  | 1q32.1        |
| RP11-70G20   | 1q32.1        |
| RP11-249H15  | 1q32.1        |
| RP11-145I13  | 1q32.2        |
| RP11-79M12   | 1q32.2        |
| RP11-161F11  | 1q32.3        |
| RP11-45L21   | 1q41          |
| RP11-192M1   | 1q42.12       |
| RP11-123I5   | 1q42.2        |
| RP11-155C15  | 1q42.2        |
| RP11-188A4   | 1q43          |
| RP11-91E9    | 2p24.3        |
| RP11-88F6    | 2p23.3        |
| RP11-57F9    | 2p23.2        |
| RP11-90D1    | 2p16.1        |
| RP11-91G19   | 2p13.3        |
| RP11-84M16   | 2p11.2        |
| RP11-89O22   | 2q12.1        |
| RP11-1L22    | 2q21.2        |
| RP11-81P1    | 2q24.1        |
| RP11-57C6    | 2q33.1        |
| RP11-53G6    | 2q35          |
| RP11-91C14   | 2q36.3-2q37.1 |
| RP11-121D3   | 3p26.3        |
| RP11-91K4    | 3p25.3        |
| RP11-105H19  | 3p25.3        |
| RP11-57D6    | 3p25.2        |
| RP11-41F5    | 3p24.3-3p24.2 |
| RP11-119L2   | 3p22.1        |

|             |                 |
|-------------|-----------------|
| RP11-81N21  | 3p21.33-3p21.32 |
| RP11-91M18  | 3p21.31         |
| RP11-91M15  | 3q11.2          |
| RP11-153K19 | 3q13.2          |
| RP11-169N13 | 3q13.33         |
| RP11-162J10 | 3q22.3          |
| RP11-326J2  | 3q29            |
| RP11-317B7  | 4p16.3          |
| RP11-7A6    | 4p16.2          |
| RP11-75N18  | 4p16.1          |
| RP11-101J14 | 4p16.1          |
| RP11-17I9   | 4p16.1          |
| RP11-160F4  | 4p15.1          |
| RP11-17P19  | 4q21.21         |
| RP11-81P7   | 4q32.1          |
| RP11-91A5   | 5p14.3          |
| RP11-190C5  | 5q11.2          |
| RP11-59G13  | 5q11.2          |
| RP11-174I22 | 5q12.1          |
| RP11-480H11 | 5q12.3          |
| RP11-87D20  | 5q12.3          |
| RP11-91I17  | 5q14.1          |
| RP11-89G4   | 5q23.3          |
| RP11-21C10  | 5q31.1          |
| RP11-233E5  | 5q31.2          |
| RP11-79K4   | 5q31.3          |
| RP11-91G17  | 5q33.2          |
| RP11-105L4  | 5q35.2          |
| RP11-13F18  | 6p25.3          |
| RP11-24N8   | 6p25.1          |
| RP11-177C16 | 6p24.3          |
| RP11-91C13  | 6p24.3          |
| RP11-27F12  | 6p23            |
| RP11-119C22 | 6p21.31         |
| RP11-425A7  | 6p21.31         |
| RP11-552E20 | 6p21.2          |
| RP11-105P7  | 6p21.2          |
| RP11-284E1  | 6p12.1          |
| RP11-88N6   | 6q12            |
| RP11-554D15 | 6q13            |
| RP11-177G23 | 6q14.1          |
| RP11-32O2   | 6q14.3          |
| RP11-79I12  | 6q21            |
| RP11-721G11 | 6q22.1          |
| RP11-138M12 | 6q22.31         |
| RP11-177M14 | 6q23.2          |
| RP11-557H15 | 6q23.2          |
| RP11-91G15  | 6q23.3          |
| RP11-472G23 | 6q25.1          |
| RP11-79G16  | 7p21.2          |
| RP11-89B15  | 7p21.1          |
| RP11-34N11  | 7p15.1          |
| RP11-89N17  | 7p14.3          |
| RP11-115G23 | 7p14.2          |

|             |               |
|-------------|---------------|
| RP11-146C1  | 7p13          |
| RP11-11D14  | 7p12.3        |
| RP11-91C9   | 7p12.1        |
| RP11-90C3   | 7q11.21       |
| RP11-49N15  | 7q21.3        |
| RP11-110C11 | 7q31.2        |
| RP11-48O1   | 7q31.32       |
| RP11-81B7   | 7q32.1        |
| RP11-79K23  | 7q35-7q36.1   |
| RP11-106C6  | 7q36.1        |
| RP11-81I21  | 7q36.1        |
| RP11-58F7   | 7q36.3        |
| RP11-241I4  | 8p23.1        |
| RP11-80B8   | 8p23.1        |
| RP11-89M8   | 8p21.3        |
| RP11-90M13  | 8p21.2        |
| RP11-232J22 | 8p21.2        |
| RP11-116F9  | 8p21.1        |
| RP11-89N2   | 8p12          |
| RP11-265K5  | 8p12          |
| RP11-100B16 | 8p12-8p11.23  |
| RP11-88J18  | 8q24.12       |
| RP11-150N13 | 8q24.13       |
| RP11-184M21 | 8q24.22       |
| RP11-88M23  | 8q24.22       |
| RP11-13A18  | 8q24.3        |
| RP11-156G14 | 9p13.3        |
| RP11-61G7   | 9p13.3        |
| RP11-12P15  | 9p13.2        |
| RP11-3J10   | 9p13.2        |
| RP11-16N10  | 9q21.11       |
| RP11-159H20 | 9q21.2        |
| RP11-85C21  | 9q33.3        |
| RP11-667H17 | 9q21.33       |
| RP11-14C18  | 9q21.33       |
| RP11-8C21   | 9q22.1-9q22.2 |
| RP11-31N23  | 9q22.2        |
| RP11-34J23  | 9q22.32       |
| RP11-69F21  | 9q22.33       |
| RP11-413C10 | 9q31.1        |
| RP11-408O19 | 9q32          |
| RP11-10I9   | 9q32          |
| RP11-46P18  | 9q32          |
| RP11-16A3   | 9q32          |
| RP11-1M19   | 9q33.3        |
| RP11-339B21 | 9q34.11       |
| RP11-88G17  | 9q34.11       |
| RP11-170E9  | 9q34.13       |
| RP11-485N19 | 9q34.3        |
| RP11-611D20 | 9q34.3        |
| RP11-417A4  | 9q34.3        |
| RP11-809C18 | 10p15.3       |
| RP11-89H22  | 10p15.1       |
| RP11-77O20  | 10p15.1       |

|             |                   |
|-------------|-------------------|
| RP11-197K17 | 10p14             |
| RP11-89C21  | 10p14             |
| RP11-394I23 | 10p13             |
| RP11-66F24  | 10p12.2           |
| RP11-90F7   | 10p12.2           |
| RP11-80H4   | 10q11.21          |
| RP11-92I18  | 10q11.23          |
| RP11-79A2   | 10q21.1           |
| RP11-91H19  | 10q21.1           |
| RP11-50K4   | 10q22.1           |
| RP11-17O5   | 10q22.3           |
| RP11-428P16 | 10q22.3           |
| RP11-157J13 | 10q22.3           |
| RP11-342M3  | 10q22.3           |
| RP11-89G15  | 10q24.32          |
| RP11-541N10 | 10q24.33          |
| RP11-106N20 | 10q25.2-10q25.3   |
| RP11-33D13  | 10q25.3           |
| RP11-79A18  | 10q26.11          |
| RP11-79M19  | 10q26.11          |
| RP11-47G11  | 10q26.13          |
| RP11-16P8   | 10q26.2           |
| RP11-88B12  | 10q26.2           |
| RP11-400F15 | 10q26.3           |
| RP11-408L20 | 10q26.3           |
| RP11-90P9   | 11p15.4           |
| RP11-205O15 | 11p15.4           |
| RP11-21N2   | 11p15.4           |
| RP11-39F19  | 11p15.2           |
| RP11-89P13  | 11p15.2           |
| RP11-80B10  | 11p15.1           |
| RP11-203L7  | 11p14.2           |
| RP11-128F16 | 11p13             |
| RP11-36H11  | 11p13-11p12       |
| RP11-100N3  | 11q11             |
| RP11-49D19  | 11q12.3           |
| RP11-160L9  | 11q13.2           |
| RP11-120P20 | 11q13.4           |
| RP11-119C13 | 11q13.5           |
| RP11-102K15 | 11q14.1           |
| RP11-5G24   | 11q22.1           |
| RP11-163A13 | 11q23.1           |
| RP11-100J10 | 11q23.1-11q23.2   |
| RP11-36M5   | 11q23.2           |
| RP11-35P15  | 11q23.3           |
| CTD-2193M6  | Not found         |
| RP11-7F12   | 11q25             |
| RP11-24N12  | 12p13.33-12p13.32 |
| RP11-451H11 | 12p13.31          |
| RP11-502N13 | 12p13.1           |
| RP11-174L5  | 12p12.3           |
| RP11-90K13  | 12p11.21          |
| RP11-463G20 | 12q12             |
| RP11-79O1   | 12q13.13          |

|             |                  |
|-------------|------------------|
| RP11-1100L3 | 12q13.13         |
| RP11-39G24  | 12q14.1          |
| RP11-82I16  | 12q22            |
| RP11-74K11  | 12q22            |
| RP11-64J11  | 12q23.1          |
| RP11-205I24 | 12q23.3          |
| RP11-5O2    | 12q23.3          |
| RP11-333I15 | 12q24.21         |
| RP11-91M21  | 12q24.21         |
| RP11-183N5  | 12q24.22         |
| RP11-91C24  | 13q12.13         |
| RP11-35M5   | 13q12.2          |
| RP11-11C5   | 13q21.33-13q22.1 |
| RP11-195A5  | 13q32.1-13q32.2  |
| RP11-484I6  | 13q33.1          |
| RP11-233E7  | 13q33.3          |
| RP11-98F14  | 13q34            |
| RP11-332N6  | 14q11.2          |
| RP11-115A12 | 14q11.2          |
| RP11-152G22 | 14q11.2          |
| RP11-458A21 | 14q13.3          |
| RP11-453F20 | 14q21.2          |
| RP11-64I19  | 14q23.1          |
| RP11-44K16  | 14q23.2-14q23.3  |
| RP11-74M3   | 14q24.1          |
| RP11-89H23  | 14q24.2-14q24.3  |
| RP11-16O4   | 14q32.12         |
| RP11-90P19  | 14q32.12         |
| RP11-80F23  | 14q32.13-14q32.2 |
| RP11-89G24  | 14q32.2          |
| RP11-88P10  | 15q12            |
| RP11-256M2  | 15q12            |
| RP11-38E12  | 15q13.2-15q13.3  |
| RP11-239O2  | 15q15.1          |
| RP11-507J18 | 15q21.2          |
| RP11-209K10 | 15q21.3          |
| RP11-139H15 | 15q21.3          |
| RP11-53I4   | 15q22.31         |
| RP11-89L21  | 15q23            |
| RP11-79J21  | 15q24.2-15q24.3  |
| RP11-60J21  | 15q25.1          |
| RP11-165B11 | 16p13.13         |
| RP11-91M7   | 16p13.12         |
| RP11-215M5  | 16q12.1          |
| RP11-48I18  | 16q12.1          |
| RP11-424K7  | 16q12.1          |
| RP11-3A9    | 16q22.1          |
| RP11-151M19 | 16q22.1          |
| RP11-224E17 | 16q22.1          |
| RP11-27D1   | 16q23.1          |
| RP11-457K7  | 16q23.3          |
| RP11-442O1  | 16q24.1          |
| RP11-118F19 | 16q24.1          |
| RP11-4F24   | 17p13.3          |

|             |                   |
|-------------|-------------------|
| RP11-746E8  | 17p12             |
| RP11-525O11 | 17p11.2           |
| RP11-525H19 | 17q11.2           |
| RP11-398A1  | 17q11.2           |
| RP11-9M20   | 17q21.31          |
| RP11-510P20 | 17q21.31-17q21.32 |
| RP11-36J16  | 17q21.32          |
| RP11-89H15  | 17q23.3           |
| RP11-79K13  | 17q24.2           |
| RP11-84E24  | 17q24.3           |
| RP11-91M1   | 17q25.1           |
| RP11-225G19 | 17q25.1           |
| RP11-89B11  | 17q25.1           |
| RP11-128J1  | 17q25.3           |
| RP11-165M24 | 17q25.3           |
| RP11-80P2   | 18q21.1           |
| RP11-79L5   | 18q21.31          |
| RP11-105L16 | 18q22.1           |
| RP11-53N15  | 18q22.3           |
| RP11-7H17   | 18q23             |
| RP11-75H6   | 19p13.3           |
| RP11-815E8  | 19p13.3           |
| RP11-798B19 | Not found         |
| RP11-413M18 | 19p13.11          |
| RP11-79E22  | 19p13.11          |
| RP11-678G14 | 19p12             |
| RP11-713L7  | Not found         |
| RP11-451E12 | 19q12             |
| RP11-18J6   | 19q12             |
| RP11-452P5  | Not found         |
| RP11-118P21 | 19q13.2           |
| RP11-133A7  | 19q13.2           |
| RP11-208I3  | 19q13.2           |
| RP11-2O22   | 19q13.31          |
| RP11-84C16  | 19q13.31          |
| RP11-335I15 | Not found         |
| RP11-43N16  | 19q13.32          |
| RP11-10I11  | 19q13.41          |
| RP11-158G19 | 19q13.42          |
| RP11-174J9  | Not found         |
| RP11-24E15  | 20p13             |
| RP11-149O7  | 20p12.3           |
| RP11-79F17  | 20p11.23          |
| RP11-91G1   | 20p11.23          |
| RP11-7F10   | 20p11.22          |
| RP11-79K14  | 20p11.21          |
| RP11-134I8  | 18p11.21          |
| RP11-79G10  | 20q12             |
| RP11-124D1  | 20q13.13          |
| RP11-402F1  | 20q13.32          |
| RP11-105O24 | 21q22.13          |
| RP11-81B3   | 22q11.21          |
| RP11-186O8  | 22q11.21          |
| RP11-89A2   | 22q12.1           |

|             |          |
|-------------|----------|
| RP11-91K24  | 22q12.1  |
| RP11-46E17  | 22q12.1  |
| RP11-541J16 | 22q12.1  |
| RP11-329J7  | 22q12.1  |
| RP11-79G6   | 22q12.2  |
| RP11-105I18 | 22q12.3  |
| RP11-116K16 | 22q13.2  |
| RP11-262A13 | 22q13.32 |
| RP11-232E17 | 22q13.33 |
| RP11-428L10 | 22q13.33 |
| RP11-367L17 | Xp22.12  |

\* Based on the UCSC Genome Browser (<http://genome.ucsc.edu/cgi-bin/hgGateway>).

Supplementary Table SII. Genes located on BAC clones described in Tables II and III.

(a) BAC clones described in Table II.

| BAC clone ID | Genes *                                   |
|--------------|-------------------------------------------|
| RP11-121D3   | CNTN4                                     |
| RP11-89G4    | C5orf56, IRF1, IL5, RAD50                 |
| RP11-177M14  | EYA4                                      |
| RP11-92I18   | DRGX, ERCC6, PGBD3                        |
| RP11-36H11   | PRR5L, AK128396, TRAF6, RAG1              |
| RP11-91M21   | TBX5, AK091766                            |
| RP11-458A21  | Pax9                                      |
| RP11-88P10   | AK124933                                  |
| RP11-424K7   | SALL1                                     |
| RP11-2O22    | ZFP112, ZNF285A, ZNF229, ZNF180, CEACAM20 |
| RP11-149O7   | BC027588                                  |
| RP11-79G10   | None                                      |

(b) BAC clones described in Table III.

| BAC clone ID | Genes *                                |
|--------------|----------------------------------------|
| RP11-101J8   | CD1A, CD1C, CD1B, CD1E, OR10T2, OR10K2 |
| RP11-137N24  | KIAA0040                               |
| RP11-180L21  | PRKCE                                  |
| RP11-91K8    | BFSP2, BC007984                        |
| RP11-89E2    | BC035172                               |
| RP11-81B23   | BG723080                               |
| RP11-373P23  | UBE2D1, TFAM, BICC1                    |
| RP11-666F17  | ITPR2                                  |
| RP11-165B11  | RUNDC2A, SNX29                         |
| RP11-236B14  | ZNF473                                 |
| RP11-92A14   | CHODL                                  |

\* Based on the UCSC Genome Browser (<http://genome.ucsc.edu/cgi-bin/hgGateway>).



Figure 3

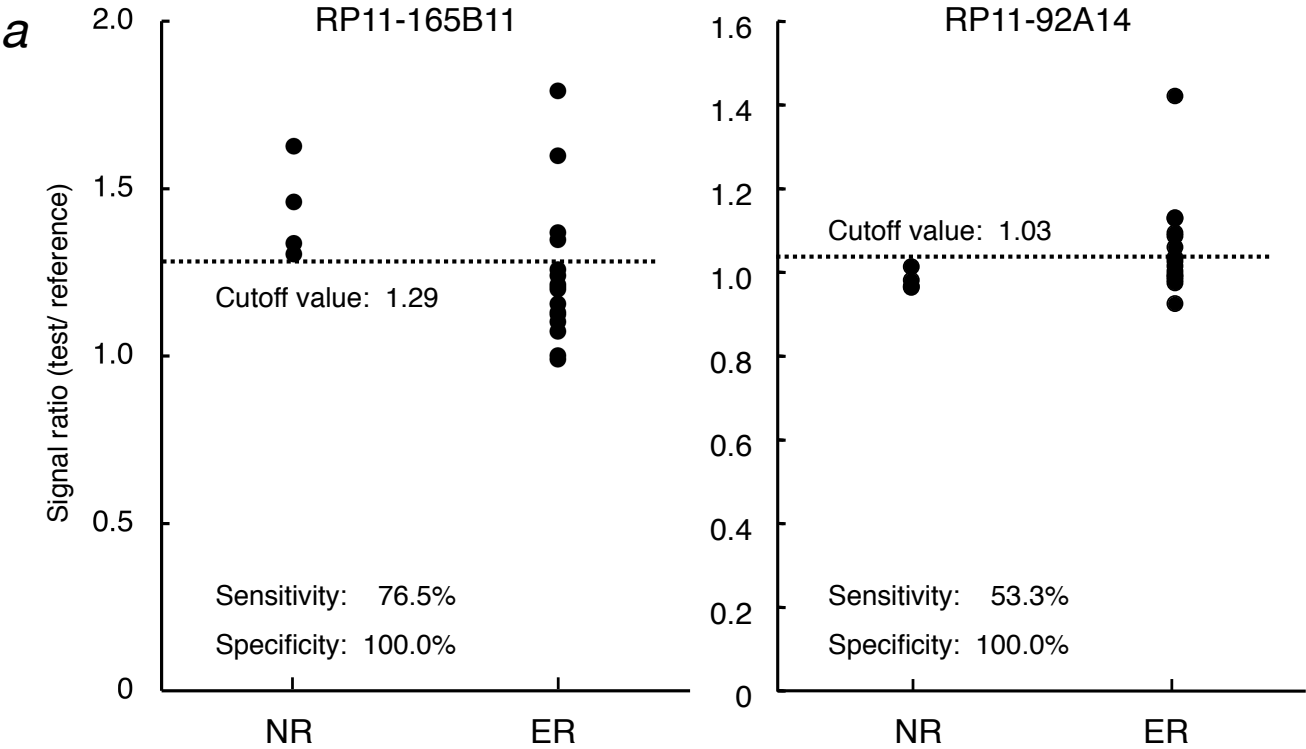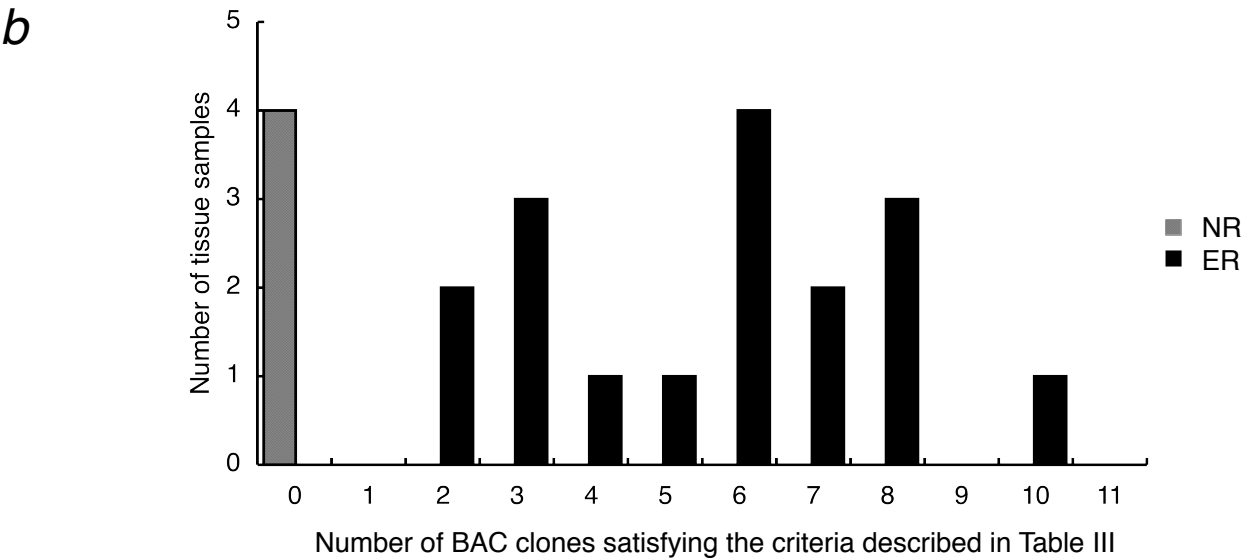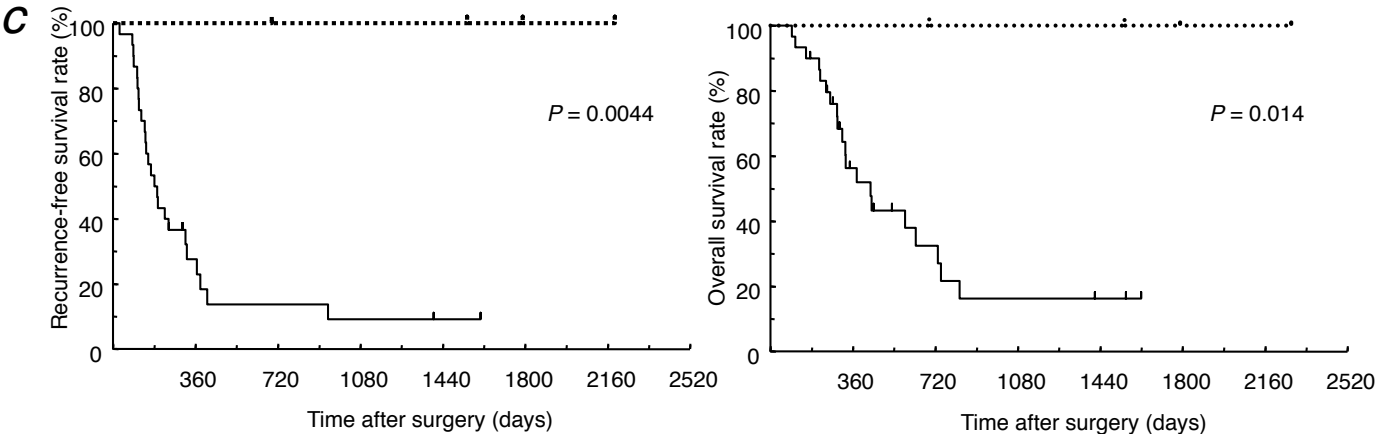

Supplement: f1 [file 780836.f1.pdf]
